# Supplementary material
Source: Springer Nature journal article supplement (https://www.springermedizin.de/resource/supplementary/12888_2011_984_MOESM2_ESM.pdf/9479542)

## Olanzapine LAI

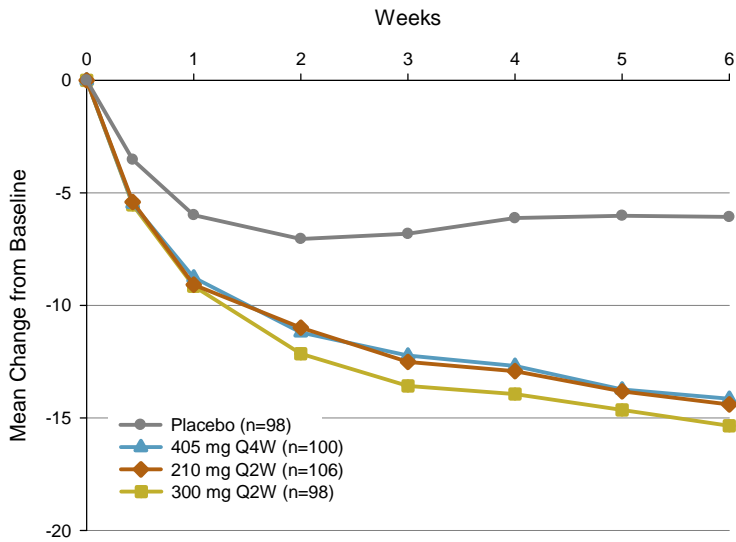

## Oral Study 1

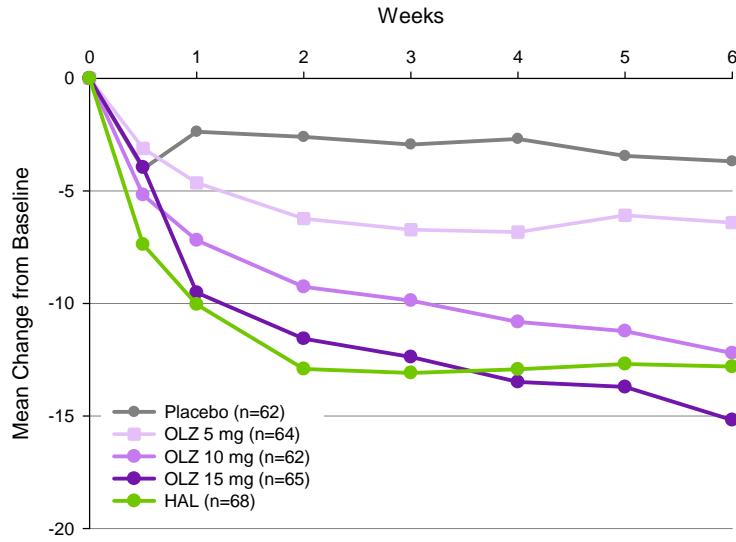

## Oral Study 2

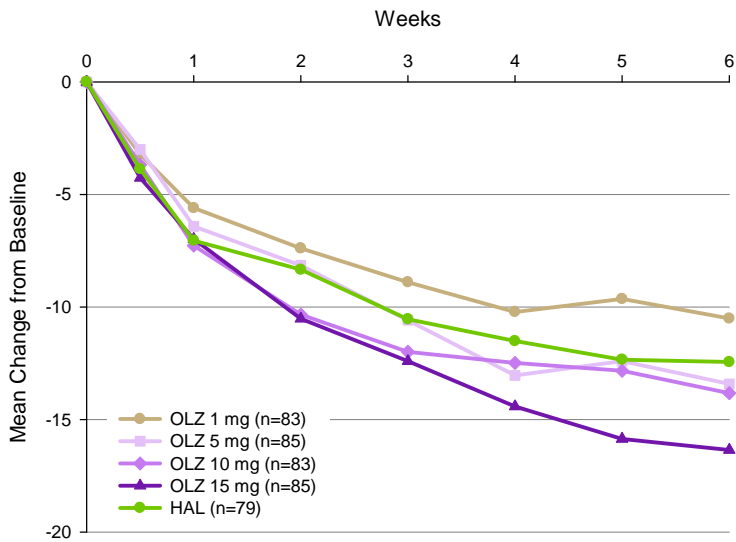

## Oral Study 3

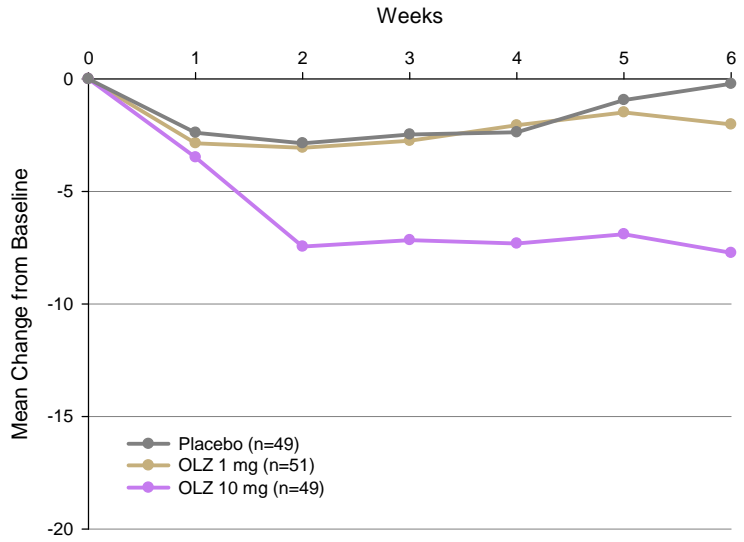

Supplement: MOESM2 [file 9479542]
